# Supplementary material
Source: PubMed Central journal article supplement (PMC8720512)
Supplement: NIHMS1757071-supplement-SI.pdf [file NIHMS1757071-supplement-SI.pdf]

## Supplementary Material for

### How do cyclic antibiotics with activity against Gram-negative bacteria permeate membranes?

#### A machine learning informed experimental study

Michelle W. Lee<sup>a</sup>, Jaime de Anda<sup>a</sup>, Carsten Kroll<sup>b</sup>, Christoph Bieniossek<sup>b</sup>, Kenneth Bradley<sup>b</sup>, Kurt E. Amrein<sup>b</sup>, and Gerard C. L. Wong<sup>a,\*</sup>

<sup>a</sup>Department of Bioengineering, Department of Chemistry, California NanoSystems Institute, University of California, Los Angeles, Los Angeles, CA 90095, United States

<sup>b</sup>Roche Pharma Research and Early Development Pharmaceutical Science, Roche, Innovation Center Basel, F. Hoffmann-La Roche Ltd, 4070 Basel, Switzerland

\*To whom correspondence should be addressed: [gclwong@seas.ucla.edu](mailto:gclwong@seas.ucla.edu)

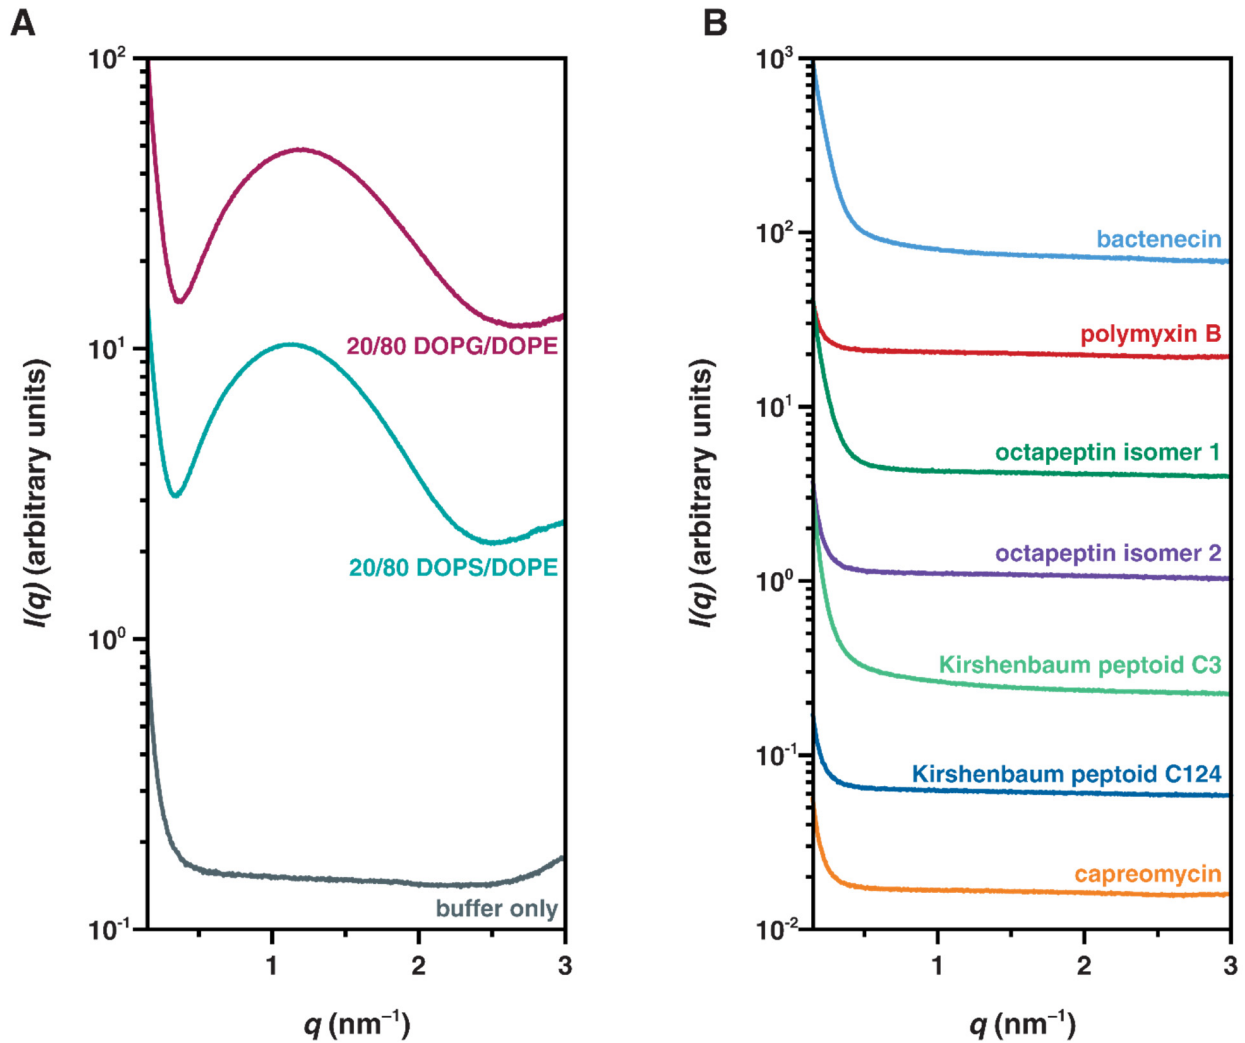

Figure S1. SAXS spectra from controls. (A) ULVs and buffer. (B) Cyclic antibiotics.
